# Supplementary material
Source: publisher figshare collection journal article supplement (https://gsajournals.figshare.com/ndownloader/files/12367031)
Supplement: Supplementary file 1 [file 12367031]

## Sheet: Key
Pop		Type		Data Columns
G=German		M=mutant		GOD=generations of divergence
I=Israel		C=Control		AM=age at maturity (days)
				Egg=number of eggs at maturity
				Sizemm=body length at maturity (mm)
				Maxv=maximum velocity (mm/s)
				Meanv=mean velocity (mm/s)
				SDv=standard deviation of velocity (mm/s)

## Sheet:  Raw Data
Pop	Clone	Type	Line	GOD	AM	Egg	Sizemm	Maxv	Meanv	SDv
G	A	M	one	21	12	9	3.3125	10.95	3.11	1.996
G	A	M	one	21	13	6	3.0625	5.821	0.865	0.968
G	A	M	one	21	13	8	3	8.328	2.044	1.746
G	A	M	one	21	13	6	2.9375	6.584	1.388	1.118
G	A	M	one	21	13	4	3.125	5.814	1.43	0.998
G	A	M	one	21	14	6	3.1875	6.197	1.456	1.161
G	A	M	one	21	14	5	3.1875	7.184	1.15	1.176
G	A	M	one	21	16	8	3.375	8.061	1.74	1.417
G	A	M	one	21	17	4	3.25	6.176	1.721	1.263
G	A	M	one	21	12	8	3.0625	9.471	1.733	1.526
G	A	M	one	21	12	6	3	6.188	1.487	1.037
G	A	M	one	21	12	4	3.125	10.198	1.501	1.203
G	A	M	one	21	13	4	3.1875	6.78	1.519	1.201
G	A	M	one	21	13	4	3.0625	9.344	1.849	1.408
G	A	M	two	17	12	7	2.9375	6.524	1.425	1.074
G	A	M	two	17	12	8	2.9375	7.742	1.592	1.511
G	A	M	two	17	13	5	2.875	6.827	1.926	1.463
G	A	M	two	17	12	6	3	4.251	0.863	0.962
G	A	M	two	17	12	6	3.1875	6.574	1.248	1.577
G	A	M	two	17	13	4	2.875	9.507	2.208	1.669
G	A	M	two	17	15	8	3.1875	9.773	2.824	1.804
G	A	M	two	17	11	9	3.25	5.755	1.509	1.126
G	A	M	two	17	12	7	3	7.386	2.148	1.359
G	A	M	two	17	12	6	2.875	3.63	1.076	0.794
G	A	M	three	24	12	5	3.125	6.65	1.804	1.328
G	A	M	three	24	12	5	2.9375	11.393	2.125	1.754
G	A	M	three	24	13	6	3.125	8.361	1.713	1.354
G	A	M	three	24	13	7	3.125	9.387	1.581	1.515
G	A	M	three	24	13	6	3	2.771	0.689	0.534
G	A	M	three	24	15	4	3.125	9.311	1.695	1.405
G	A	M	three	24	16	3	3	4.64	1.153	0.989
G	A	M	three	24	13	6	3	4.212	1.469	0.88
G	A	M	four	13	12	7	3	8.011	1.692	1.233
G	A	M	four	13	12	6	2.875	8.711	1.816	1.541
G	A	M	four	13	12	5	2.875	7.691	1.712	1.391
G	A	M	four	13	12	8	3.1875	6.205	1.241	1.038
G	A	M	four	13	12	5	2.9375	8.868	2.018	1.559
G	A	M	four	13	13	6	2.9375	6.558	1.733	1.264
G	A	M	four	13	13	3	2.875	8.384	2.228	1.79
G	A	M	four	13	17	5	3	8.514	1.67	1.34
G	A	M	four	13	17	5	2.8125	8.609	1.099	1.19
G	A	M	four	13	14	5	3.125	3.866	0.635	0.704
G	A	M	four	13	14	5	3	2.925	0.245	0.427
G	A	M	four	13	18	5	2.875	7.112	0.409	1.058
G	A	M	five	21	13	6	2.9375	8.691	1.6	1.33
G	A	M	five	21	13	6	3	12.32	2.128	1.646
G	A	M	five	21	12	6	2.875	8.681	1.691	1.572
G	A	M	five	21	12	6	2.875	10.991	1.867	1.687
G	A	M	five	21	12	6	2.9375	5.175	1.353	1.097
G	A	M	five	21	12	6	2.8125	8.162	1.76	1.481
G	A	M	five	21	16	6	3.25	9.571	2.181	1.937
G	A	M	five	21	16	5	2.9375	7.881	2.085	1.516
G	A	M	five	21	16	6	3.1875	7.881	2.085	1.516
G	A	M	five	21	13	5	2.9375	5.397	1.291	1.094
G	A	M	five	21	15	9	3.1875	6.475	1.779	1.235
G	A	M	five	21	16	4	3.0625	7.477	2.03	1.753
G	A	M	five	21	12	6	2.875	8.21	1.785	1.542
G	A	M	five	21	12	6	2.9375	9.964	2.131	1.548
G	A	C	control	0	17	2	2.625	5.547	1.656	1.18
G	A	C	control	0	17	6	2.8125	4.878	1.454	0.854
G	A	C	control	0	17	5	2.875	5.606	1.707	1.072
G	A	C	control	0	14	5	3	5.783	1.148	0.923
G	A	C	control	0	14	5	2.9375	7.339	2.253	1.506
G	A	C	control	0	14	5	2.875	5.901	1.555	1.038
G	A	C	control	0	13	5	3.1875	74.931	17.649	14.45
G	A	C	control	0	13	8	3.0625	68.043	15.182	12.592
G	A	C	control	0	13	9	3	83.651	17.416	14.977
G	A	C	control	0	14	5	3.0625	88.402	17.599	15.4
G	A	C	control	0	12	8	3.0625	98.517	19.378	19.582
G	A	C	control	0	12	7	3	75.609	13.799	15.158
G	A	C	control	0	12	6	3	72.976	16.795	14.826
G	A	C	control	0	13	7	3.0625	61.311	13.54	13.116
G	A	C	control	0	13	7	3	65.235	10.266	12.103
G	A	C	control	0	16	5	3.125	81.699	17.016	15.908
G	A	C	control	0	16	5	3	92.691	17.503	16.526
G	A	C	control	0	12	6	3.125	77.542	18.928	15.428
G	A	C	control	0	12	6	2.9375	86.613	14.93	12.294
G	A	C	control	0	13	6	2.9375	89.47	20.035	17.403
G	A	C	control	0	15	5	3.125	49.935	6.339	9.411
G	A	C	control	0	16	5	2.9375	115.447	12.235	13.629
G	A	C	control	0	15	6	3.0625	57.19	16.998	12.327
G	A	C	control	0	16	6	3.125	91.295	15.925	14.203
G	A	C	control	0	16	5	3.0625	68.145	18.014	13.306
G	A	C	control	0	13	8	3.1875	54.763	14.446	12.156
G	A	C	control	0	13	9	3.1875	61.121	15.706	13.641
G	A	C	control	0	13	8	3.0625	82.133	16.334	15.339
G	A	C	control	0	12	5	2.9375	6.631	1.37	1.158
G	A	C	control	0	14	7	3.1875	7.458	2.297	1.406
G	A	C	control	0	14	9	3.25	6.88	2.078	1.172
G	A	C	control	0	15	7	3.1875	6.061	1.804	1.166
G	A	C	control	0	15	5	3.125	7.885	2.107	1.572
G	A	C	control	0	15	6	3.1875	9.562	2.523	1.729
G	A	C	control	0	16	7	3.1875	5.909	1.293	1.126
G	A	C	control	0	16	8	3.125	8.718	1.616	1.401
G	B	M	one	23	11	3	3.125	9.153	2.046	1.598
G	B	M	one	23	12	4	3.0625	7.866	1.617	1.237
G	B	M	one	23	12	4	2.8125	10.067	1.835	1.493
G	B	M	one	23	13	6	2.875	10.342	2.189	1.656
G	B	M	one	23	13	5	3	8.379	2.046	1.68
G	B	M	one	23	13	5	2.875	6.963	1.847	1.429
G	B	M	one	23	12	4	3.125	10.942	2.104	1.795
G	B	M	one	23	13	8	3.125	11.309	2.087	1.697
G	B	M	one	23	14	3	2.875	8.129	1.669	1.346
G	B	M	one	23	14	4	3.0625	9.036	1.78	1.604
G	B	M	one	23	14	4	2.875	9.021	1.448	1.226
G	B	M	two	21	12	8	3.125	6.805	1.235	1.276
G	B	M	two	21	12	9	3.125	6.089	1.608	1.089
G	B	M	two	21	12	6	3.1875	10.067	2.076	1.575
G	B	M	two	21	12	8	3.0625	8.155	1.586	1.513
G	B	M	two	21	11	6	2.875	130.555	19.358	19.35
G	B	M	two	21	11	4	2.9375	59.265	12.249	13.104
G	B	M	two	21	13	6	3.25	78.873	14.762	15.915
G	B	M	two	21	12	6	2.9375	101.797	19.347	17.477
G	B	M	two	21	12	5	2.8125	103.865	21.829	17.465
G	B	M	two	21	12	4	2.8125	7.566	1.864	1.391
G	B	M	two	21	12	4	2.9375	6.733	1.643	1.148
G	B	M	two	21	13	3	2.8125	7.3	1.86	1.372
G	B	M	two	21	13	5	3	9.283	2.171	1.617
G	B	M	two	21	14	4	2.875	6.608	0.907	0.923
G	B	M	three	21	12	5	2.8125	9.474	1.965	1.49
G	B	M	three	21	12	6	2.75	12.358	2.214	1.857
G	B	M	three	21	14	6	2.9375	7.422	1.772	1.16
G	B	M	three	21	13	5	3	9.799	1.587	1.717
G	B	M	three	21	13	4	2.875	10.858	2.152	1.578
G	B	M	three	21	15	5	2.9375	9.36	2.33	1.686
G	B	M	three	21	13	7	2.9375	6.914	1.552	1.53
G	B	M	three	21	13	4	2.9375	12.741	2.226	1.999
G	B	M	three	21	12	5	3.125	7.641	1.888	1.371
G	B	M	three	21	12	5	3.0625	7.736	1.483	1.321
G	B	M	three	21	13	5	2.8125	6.459	1.627	1.135
G	B	M	three	21	13	6	2.875	8.929	2.053	1.31
G	B	M	three	21	13	4	2.8125	6.934	0.831	0.933
G	B	M	four	19	13	4	2.8125	95.739	19.817	17.53
G	B	M	four	19	13	5	2.875	103.114	20.336	17
G	B	M	four	19	13	5	2.9375	73.72	17.498	12.74
G	B	M	four	19	13	5	2.875	60.08	14.041	14.206
G	B	M	four	19	13	5	2.875	80.779	13.301	15.092
G	B	M	four	19	10	6	3.0625	82.118	17.05	15.224
G	B	M	four	19	10	6	3.0625	109.701	23.093	20.503
G	B	M	four	19	10	6	3.0625	84.186	18.539	16.495
G	B	M	five	23	12	5	2.875	90.321	18.526	16.708
G	B	M	five	23	12	4	2.9375	74.957	11.852	11.142
G	B	M	five	23	12	3	2.875	71.46	13.777	12.37
G	B	M	five	23	12	6	3.125	53.455	11.314	12.633
G	B	M	five	23	12	6	3.125	57.86	13.417	11.231
G	B	M	five	23	12	7	3	47.442	11.453	8.354
G	B	M	five	23	12	6	3.0625	90.973	18.486	16.213
G	B	M	five	23	12	5	3.0625	95.741	16.119	14.382
G	B	M	five	23	13	4	2.9375	61.615	15.488	10.726
G	B	C	control	0	15	6	3.125	94.534	12.694	15.271
G	B	C	control	0	16	6	3	106.025	22.703	20.173
G	B	C	control	0	16	5	2.875	79.713	12.816	12.715
G	B	C	control	0	12	4	2.875	136.98	25.248	21.329
G	B	C	control	0	12	5	3	80.151	21.13	16.383
G	B	C	control	0	12	6	3	85.937	21.144	15.664
G	B	C	control	0	12	5	2.875	31.13	5.082	6.912
G	B	C	control	0	12	5	3.1875	115.124	10.237	15.192
G	B	C	control	0	12	5	3.0625	10.208	1.642	1.399
G	B	C	control	0	12	4	2.8125	10.494	1.81	1.514
G	B	C	control	0	15	5	2.9375	8.984	1.785	1.552
G	B	C	control	0	15	4	2.875	3.835	0.284	0.586
G	B	C	control	0	15	4	2.875	9.967	1.837	1.484
G	B	C	control	0	13	6	2.9375	4.883	1.188	0.858
G	B	C	control	0	13	5	2.8125	12.847	2.104	1.638
G	B	C	control	0	12	4	2.8125	9.595	1.729	1.465
G	B	C	control	0	12	7	3.125	8.473	1.986	1.39
G	B	C	control	0	12	5	2.875	7.474	1.997	1.45
G	B	C	control	0	15	4	2.8125	10.455	1.973	1.597
G	B	C	control	0	16	4	2.8125	8.377	1.313	1.136
G	B	C	control	0	16	4	2.75	8.448	1.793	1.401
G	B	C	control	0	14	4	2.8125	10.539	1.887	1.486
G	B	C	control	0	14	4	2.875	8.987	1.654	1.365
G	B	C	control	0	15	5	2.875	7.285	2.08	1.3
G	B	C	control	0	15	5	2.875	6.333	1.934	1.386
G	B	C	control	0	12	5	2.8125	9.331	1.044	1.059
G	B	C	control	0	12	6	3.0625	7.94	1.501	1.446
G	B	C	control	0	12	5	2.875	12.097	2.401	1.931
G	B	C	control	0	15	6	2.9375	5.84	1.268	1.369
G	B	C	control	0	12	6	2.9375	8.047	1.701	1.302
G	B	C	control	0	14	6	3.125	8.149	1.832	1.526
G	B	C	control	0	14	7	3.125	5.714	1.718	1.141
G	B	C	control	0	12	5	2.8125	6.267	2.275	1.256
G	B	C	control	0	12	4	2.9375	8.238	2.175	1.497
G	B	C	control	0	12	5	3	6.216	1.962	1.155
G	B	C	control	0	13	4	3	6.363	1.277	1.226
G	B	C	control	0	13	4	3	9.19	1.762	1.291
G	B	C	control	0	13	3	2.8125	9.371	1.294	1.376
G	B	C	control	0	13	5	2.9375	9.518	1.584	1.273
G	C	M	one	22	16	2	2.75	60.208	12.485	11.994
G	C	M	one	22	16	4	2.875	81.438	19.55	16.617
G	C	M	one	22	11	4	2.8125	106.621	23.651	20.671
G	C	M	one	22	11	5	2.875	74.007	16.702	16.251
G	C	M	one	22	15	4	3.0625	63.946	15.067	13.779
G	C	M	one	22	15	4	3	66.972	18.733	15.211
G	C	M	one	22	15	6	3.1875	77.187	17.969	14.557
G	C	M	one	22	15	4	3	79.223	20.846	15.469
G	C	M	one	22	15	4	2.875	68.753	18.303	13.631
G	C	M	one	22	12	4	3.0625	95.208	17.861	16.716
G	C	M	one	22	12	6	2.9375	56.479	15.738	12.601
G	C	M	one	22	12	5	3	85.727	21.944	17.711
G	C	M	two	23	18	6	3.0625	62.159	8.032	9.645
G	C	M	two	23	18	4	3.0625	95.509	12.687	17.341
G	C	M	two	23	18	3	3	60.129	14.229	14.229
G	C	M	two	23	15	3	3.1875	65.813	15.938	14.712
G	C	M	two	23	15	3	2.9375	83.091	17.558	14.457
G	C	M	two	23	15	5	3.0625	78.56	23.995	17.194
G	C	M	two	23	15	6	3	40.043	7.321	9.366
G	C	M	two	23	14	7	3.0625	76.44	22.967	14.663
G	C	M	two	23	14	6	3.125	83.764	16.864	13.476
G	C	M	two	23	14	5	2.9375	97.403	21.046	17.725
G	C	M	three	24	15	4	3	79.111	14.365	13.92
G	C	M	three	24	15	6	3.125	74.263	17.908	14.416
G	C	M	three	24	15	5	2.9375	85.774	17.22	13.28
G	C	M	three	24	16	5	3.0625	93.615	19.56	18.901
G	C	M	three	24	12	7	2.8125	103.713	18.293	14.644
G	C	M	three	24	12	4	2.875	18.091	1.894	3.004
G	C	M	three	24	16	2	2.875	63.466	14.778	10.194
G	C	M	three	24	16	2	2.8125	54.967	12.52	9.945
G	C	M	four	23	16	2	2.875	66.082	17.267	10.233
G	C	M	four	23	16	2	2.8125	73.631	17.55	10.568
G	C	M	four	23	17	3	2.875	85.141	17.931	13.594
G	C	M	four	23	20	5	3	62.266	16.141	12.045
G	C	M	four	23	13	1	2.8125	68.068	15.127	13.133
G	C	M	four	23	15	3	3	84.445	12.31	12.849
G	C	M	four	23	15	4	3	63.98	15.847	11.958
G	C	M	five	22	18	1	2.75	79.55	18.113	15.436
G	C	M	five	22	20	5	2.9375	105.321	24.096	22.936
G	C	M	five	22	15	4	2.875	78.713	17.201	13.827
G	C	M	five	22	13	4	2.9375	81.51	21.44	17.057
G	C	M	five	22	16	4	3	77.866	14.531	15.541
G	C	M	five	22	16	3	2.8125	105.978	23.262	18.573
G	C	M	five	22	16	6	2.9375	48.092	12.963	12.068
G	C	M	five	22	20	3	2.8125	72.489	21.259	15.404
G	C	M	five	22	20	3	3	83.378	22.21	17.044
G	C	C	control	0	15	5	3.0625	35.473	8.662	8.36
G	C	C	control	0	16	4	2.875	67.497	14.48	13.512
G	C	C	control	0	16	4	3	69.769	19.701	14.429
G	C	C	control	0	12	5	2.875	93.357	20.729	18.426
G	C	C	control	0	15	5	3	78.465	17.391	13.553
G	C	C	control	0	16	3	2.875	63.526	16.361	15.028
G	C	C	control	0	16	4	3	76.954	22.382	15.726
G	C	C	control	0	16	3	3	86.105	15.113	14.839
G	C	C	control	0	12	3	2.9375	108.97	20.051	17.325
G	C	C	control	0	12	3	3	113.489	22.599	19.72
G	C	C	control	0	12	1	2.8125	74.105	17.315	14.976
G	C	C	control	0	16	4	2.875	68.013	15.323	12.465
G	C	C	control	0	15	5	3.0625	68.502	18.702	13.77
G	C	C	control	0	16	5	3.0625	78.506	13.189	12.262
G	C	C	control	0	15	4	3.0625	60.374	14.828	12.09
G	C	C	control	0	15	5	3	73.294	18.083	13.406
G	C	C	control	0	16	4	3	75.162	16.49	14.712
G	C	C	control	0	15	6	3.125	58.122	16.739	13.195
G	C	C	control	0	15	4	3	62.519	19.004	12.136
G	C	C	control	0	16	6	3	76.945	15.561	13.848
G	C	C	control	0	16	3	3.0625	56.455	11.14	12.035
G	C	C	control	0	16	4	3.125	44.662	15.508	9.564
G	C	C	control	0	16	4	3.125	71.345	18.63	14.307
G	C	C	control	0	14	6	2.8125	86.348	18.598	16.348
G	C	C	control	0	14	3	2.875	119.719	17.808	17.399
G	C	C	control	0	15	4	2.9375	54.318	16.902	9.826
G	C	C	control	0	15	5	2.8125	91.898	24.357	16.496
G	C	C	control	0	11	6	3.0625	84.354	16.446	12.355
G	C	C	control	0	11	5	3.0625	60.25	13.737	12.361
G	C	C	control	0	11	6	2.9375	74	17.038	14.79
G	C	C	control	0	12	4	3.125	63.486	14.023	11.348
G	C	C	control	0	12	4	2.9375	54.889	10.884	10.23
G	C	C	control	0	12	4	3	68.379	12.739	11.81
G	C	C	control	0	12	4	3	75.159	17.433	14.351
I	A	M	one	26	17	4	3.125	18.644	0.398	1.65
I	A	M	one	26	17	5	3	17.581	0.685	2.408
I	A	M	one	26	17	6	3	45.862	3.952	8.416
I	A	M	one	26	13	4	2.875	87.294	16.337	15.28
I	A	M	one	26	13	7	2.9375	53.849	8.249	10.635
I	A	M	one	26	13	6	2.6875	116.31	26.729	23.304
I	A	M	one	26	13	6	2.8125	95.003	19.446	15.696
I	A	M	one	26	13	5	2.625	101.296	19.012	16.435
I	A	M	one	26	13	6	2.8125	92.009	21.487	18.468
I	A	M	one	26	13	7	2.9375	72.189	9.164	11.819
I	A	M	one	26	13	8	2.875	56.455	12.637	13.34
I	A	M	one	26	12	8	2.9375	74.192	12.625	15.677
I	A	M	one	26	12	9	2.875	73.586	10.212	13.207
I	A	M	one	26	15	6	2.875	84.972	20.59	18.559
I	A	M	one	26	15	7	2.8125	113.223	29.627	23.875
I	A	M	two	25	13	5	2.9375	70.668	9.766	12.929
I	A	M	two	25	16	7	3.25	37.151	3.277	7.474
I	A	M	two	25	16	3	3	58.304	10.958	13.53
I	A	M	two	25	13	5	2.8125	44.723	10.602	9.919
I	A	M	two	25	17	4	2.9375	32.576	2.704	6.309
I	A	M	two	25	17	5	2.875	50.462	5.355	9.112
I	A	M	two	25	17	3	2.875	67.291	7.518	11.819
I	A	M	two	25	16	5	3.125	38.369	8.386	9.977
I	A	M	two	25	13	7	3.0625	79.524	9.236	11.595
I	A	M	two	25	13	5	2.875	66.76	11.253	11.249
I	A	M	two	25	13	7	3.0625	81.54	17.843	14.352
I	A	M	two	25	15	8	3	68.94	14.451	14.261
I	A	M	two	25	16	5	2.875	64.01	14.216	14.579
I	A	M	two	25	16	4	2.8125	92.491	19.058	17.853
I	A	M	three	25	13	8	3	90.611	20.315	16.889
I	A	M	three	25	13	3	2.8125	48.403	6.64	10.266
I	A	M	three	25	13	5	2.75	55.939	14.159	11.34
I	A	M	three	25	15	5	2.9375	33.761	2.339	5.958
I	A	M	three	25	14	8	3	35.417	8.542	9.122
I	A	M	three	25	14	7	2.9375	69.153	8.25	11.19
I	A	M	three	25	16	7	3.25	38.729	6.81	8.512
I	A	M	three	25	17	7	3	38.952	4.081	6.937
I	A	M	three	25	15	9	3.25	0.518	0.036	0.077
I	A	M	three	25	13	7	2.9375	74.903	13.74	14.085
I	A	M	three	25	14	10	3.1875	43.411	6.588	7.975
I	A	M	three	25	14	8	3.125	50.59	15.782	11.856
I	A	M	four	24	12	9	3	53.315	11.011	9.597
I	A	M	four	24	13	8	3.0625	64.827	12.714	12.304
I	A	M	four	24	13	5	2.875	80.595	12.958	12.723
I	A	M	four	24	17	5	3.125	57.678	7.555	9.51
I	A	M	four	24	17	4	3	47.411	12.968	11.208
I	A	M	four	24	18	6	3.125	69.147	9.972	11.458
I	A	M	four	24	18	5	3.125	27.34	5.611	6.383
I	A	M	four	24	17	3	3.0625	57.731	7.222	10.041
I	A	M	four	24	17	2	3.0625	70.532	8.883	9.666
I	A	M	four	24	17	4	3.1875	31.315	5.989	6.955
I	A	M	five	24	13	8	3	48.535	6.765	9.094
I	A	M	five	24	15	9	3.125	75.268	3.168	8.228
I	A	M	five	24	16	7	3	64.527	15.967	16.431
I	A	M	five	24	16	7	3.125	32.705	4.015	6.91
I	A	M	five	24	13	6	3.0625	80.108	12.455	15.067
I	A	M	five	24	13	6	3	51.32	12.501	12.966
I	A	M	five	24	13	7	3.0625	68.67	15.295	14.903
I	A	M	five	24	12	5	2.9375	79.144	12.913	14.731
I	A	M	five	24	12	6	3	93.956	15.634	14.315
I	A	M	five	24	12	7	2.875	94.406	16.675	17.236
I	A	M	five	24	12	8	2.875	64.638	15.742	13.329
I	A	C	control	0	17	5	2.6875	32.07	2.887	6.347
I	A	C	control	0	17	4	2.75	59.306	14.017	12.402
I	A	C	control	0	13	4	2.5625	73.438	14.542	14.767
I	A	C	control	0	15	8	2.875	80.167	15.853	15.036
I	A	C	control	0	15	6	2.875	69.314	11.142	13.062
I	A	C	control	0	16	3	2.875	60.381	9.171	12.575
I	A	C	control	0	16	5	2.875	76.067	8.357	9.69
I	A	C	control	0	16	6	2.8125	41.83	5.039	8.396
I	A	C	control	0	13	8	2.6875	94.487	22.808	19.76
I	A	C	control	0	13	8	2.75	114.984	20.449	19.842
I	A	C	control	0	13	4	2.8125	95.437	13.347	14.885
I	A	C	control	0	12	8	2.8125	72.802	11.751	13.242
I	A	C	control	0	13	7	2.8125	52.441	9.543	11.088
I	A	C	control	0	13	6	2.6875	58.941	10.384	11.07
I	A	C	control	0	13	7	2.8125	67.167	10.236	10.687
I	A	C	control	0	13	4	2.625	35.048	2.469	6.759
I	A	C	control	0	15	6	2.9375	49.435	12.032	12.502
I	A	C	control	0	15	6	2.9375	87.333	4.323	9.585
I	A	C	control	0	13	9	3	7.878	1.512	1.251
I	A	C	control	0	13	9	3.0625	5.292	1.11	0.969
I	A	C	control	0	13	7	3.0625	5.267	1.805	1.192
I	A	C	control	0	16	8	3.1875	6.542	0.969	1.014
I	A	C	control	0	16	6	2.9375	3.075	0.551	0.627
I	A	C	control	0	16	6	3.125	2.176	0.175	0.37
I	A	C	control	0	18	6	2.8125	20.787	1.001	3.346
I	A	C	control	0	18	9	2.9375	58.062	5.787	9.301
I	A	C	control	0	19	7	2.8125	32.607	6.114	7.392
I	A	C	control	0	19	6	2.9375	68.09	7.578	9.949
I	A	C	control	0	16	5	2.9375	41.669	5.82	8.251
I	A	C	control	0	16	4	2.6875	58.452	9.043	11.496
I	A	C	control	0	16	6	2.75	33.801	5.354	7.478
I	A	C	control	0	11	4	2.625	29.479	2.27	5.376
I	A	C	control	0	12	4	2.75	48.015	4.971	7.554
I	A	C	control	0	14	4	2.9375	52.434	9.684	10.925
I	A	C	control	0	14	5	2.9375	53.782	11.894	13.04
I	B	M	one	23	13	5	2.9375	77.515	12.533	14.34
I	B	M	one	23	15	8	3.0625	117.276	25.15	23.686
I	B	M	one	23	15	8	3	88.012	16.816	16.031
I	B	M	one	23	12	6	2.8125	56.895	10.755	7.798
I	B	M	one	23	12	5	2.875	60.056	10.854	10.493
I	B	M	one	23	15	6	3.125	62.584	17.812	13.439
I	B	M	one	23	15	6	3	54.734	9.687	8.808
I	B	M	one	23	15	8	3.0625	103.776	20.557	16.822
I	B	M	one	23	15	7	3.0625	54.803	11.856	11.23
I	B	M	one	23	14	5	3.125	99.198	18.873	15.467
I	B	M	one	23	14	8	3	59.154	16.679	13.748
I	B	M	one	23	14	6	2.9375	83.001	9.349	12.413
I	B	M	one	23	16	8	3.125	56.895	9.844	10.686
I	B	M	one	23	16	4	3	88.74	15.555	14.371
I	B	M	one	23	16	6	3.125	109.254	16.878	17.147
I	B	M	two	22	15	8	3.1875	77.918	20.316	16.05
I	B	M	two	22	15	8	3.1875	96.582	15.16	15.621
I	B	M	two	22	14	7	2.875	85.032	18.998	16.692
I	B	M	two	22	13	2	2.75	88.496	13.844	14.137
I	B	M	two	22	15	6	2.875	65.167	11.506	12.976
I	B	M	two	22	15	9	2.9375	67.043	18.946	15.603
I	B	M	two	22	12	6	2.9375	87.492	19.679	14.329
I	B	M	two	22	13	5	3	98.935	18.674	18.791
I	B	M	two	22	15	10	3.25	95.636	20.949	18.083
I	B	M	two	22	15	10	3.1875	48.401	9.79	8.747
I	B	M	two	22	15	3	3.0625	80.862	17.686	15.332
I	B	M	two	22	15	7	2.9375	58.686	8.532	11.067
I	B	M	two	22	15	7	3	60.832	17.663	14.425
I	B	M	three	24	12	5	2.8125	39.268	7.503	9.26
I	B	M	three	24	12	8	2.9375	79.709	14.234	14.765
I	B	M	three	24	12	8	2.875	79.103	13.956	14.321
I	B	M	three	24	12	6	2.875	86.112	15.325	16.019
I	B	M	three	24	15	6	3.0625	86.086	14.992	15.564
I	B	M	three	24	15	8	2.875	82.058	13.01	13.796
I	B	M	three	24	12	6	2.875	58.145	8.531	11.403
I	B	M	three	24	12	7	2.875	48.473	3.624	8.06
I	B	M	three	24	14	9	2.9375	67.132	7.002	11.903
I	B	M	three	24	14	6	2.9375	115.257	18.491	17.946
I	B	M	three	24	14	6	3	71.337	17.474	16.343
I	B	M	three	24	14	11	3	64.283	15.111	12.403
I	B	M	three	24	14	8	2.9375	56.509	11.612	11.207
I	B	M	three	24	15	8	3	51.523	7.844	9.776
I	B	M	three	24	15	5	3	65.677	10.616	12.959
I	B	M	four	23	13	8	2.8125	116.199	19.171	21.683
I	B	M	four	23	15	9	3	81.726	15.18	16.41
I	B	M	four	23	15	9	3	55.992	8.835	12.864
I	B	M	four	23	12	7	2.9375	61.229	9.793	10.153
I	B	M	four	23	12	7	2.875	51.529	9.848	10.591
I	B	M	four	23	13	8	2.8125	106.4	20.842	20.958
I	B	M	four	23	13	8	2.8125	104.534	20.688	18.734
I	B	M	four	23	12	8	2.8125	104.534	20.688	18.734
I	B	M	four	23	14	12	3	65.738	13.554	13.77
I	B	M	four	23	14	12	3	87.05	20.287	17.977
I	B	M	five	23	15	7	3	71.244	15.889	15.086
I	B	M	five	23	15	7	3.0625	41.213	10.337	9.95
I	B	M	five	23	15	6	3.0625	108.12	19.788	16.377
I	B	M	five	23	15	8	3	92.584	20.008	18.587
I	B	M	five	23	15	3	2.9375	99.05	17.15	16.399
I	B	M	five	23	15	4	2.875	84.186	17.988	16.899
I	B	M	five	23	15	8	2.9375	72.038	15.048	13.957
I	B	M	five	23	15	5	2.875	90.505	21.524	18.996
I	B	M	five	23	15	8	3.0625	72.838	4.863	10.731
I	B	M	five	23	15	10	2.9375	63.23	13.716	12.115
I	B	M	five	23	15	8	3.0625	77.093	14.698	12.939
I	B	M	five	23	15	6	3.0625	73.499	14.646	15.407
I	B	M	five	23	12	3	2.9375	97.482	18.544	18.696
I	B	M	five	23	15	8	3.0625	70.119	16.334	15.046
I	B	M	five	23	14	6	3.125	53.65	11.757	12.051
I	B	M	five	23	14	10	3.1875	100.553	23.396	17.96
I	B	C	control	0	13	4	2.9375	54.851	11.411	13.643
I	B	C	control	0	12	6	2.875	53.179	8.49	10.304
I	B	C	control	0	15	8	2.8125	71.561	17.775	16.374
I	B	C	control	0	15	9	2.875	66.353	15.836	14.052
I	B	C	control	0	13	5	2.8125	41.948	4.812	6.943
I	B	C	control	0	13	7	2.875	81.089	18.002	18.005
I	B	C	control	0	15	8	2.875	82.751	16.407	16.538
I	B	C	control	0	15	8	2.9375	105.111	18.162	18.771
I	B	C	control	0	13	11	2.9375	58.488	10.028	12.828
I	B	C	control	0	14	8	2.8125	57.929	17.726	13.993
I	B	C	control	0	12	5	2.75	112.033	16.176	15.104
I	B	C	control	0	14	7	2.8125	69.948	23.103	16.454
I	B	C	control	0	14	6	3	77.491	18.626	16.232
I	B	C	control	0	14	4	2.75	51.154	5.998	9.269
I	B	C	control	0	15	5	3	80.113	17.69	16.815
I	B	C	control	0	15	7	3	83.255	24.723	17.484
I	B	C	control	0	15	6	2.875	62.266	10.499	12.633
I	B	C	control	0	15	6	2.9375	54.763	15.859	13.781
I	B	C	control	0	12	6	2.9375	56.713	10.453	11.785
I	B	C	control	0	15	6	2.9375	68.695	19.465	16.213
I	B	C	control	0	15	6	2.875	74.188	16.973	17.047
I	B	C	control	0	12	6	2.875	63.24	19.591	13.643
I	B	C	control	0	13	5	2.9375	88.148	21.076	19.602
I	B	C	control	0	15	8	3.0625	87.983	9.548	11.708
I	B	C	control	0	15	8	2.875	34.809	3.414	7.146
I	C	M	one	24	12	6	2.875	73.234	14.084	16.143
I	C	M	one	24	12	7	3.0625	65.396	16.981	14.934
I	C	M	one	24	15	11	3.3125	70.038	8.255	13.465
I	C	M	one	24	14	7	3.125	60.032	12.693	11.931
I	C	M	one	24	14	10	3.125	36.681	5.49	8.755
I	C	M	one	24	14	7	3.125	61.504	9.603	11.795
I	C	M	one	24	15	7	3.0625	122.262	13.308	15.367
I	C	M	one	24	15	8	3.0625	0.925	0.009	0.076
I	C	M	one	24	16	5	2.9375	56.138	7.632	10.126
I	C	M	one	24	16	1	3.0625	41.068	2.598	6.013
I	C	M	one	24	14	7	2.9375	73.005	16.765	16.187
I	C	M	one	24	14	6	3.0625	78.211	17.11	17.83
I	C	M	one	24	14	7	3	60.495	12.287	10.746
I	C	M	one	24	14	9	3.25	72.18	14.469	13.917
I	C	M	one	24	15	5	3.0625	63.043	12.73	12.041
I	C	M	two	23	15	9	3.1875	36.54	2.884	7.117
I	C	M	two	23	15	9	3.125	84.386	8.554	13.174
I	C	M	two	23	15	7	3.0625	42.851	7.942	8.502
I	C	M	two	23	14	9	3	32.627	0.467	2.802
I	C	M	two	23	14	8	3.1875	30.946	0.959	3.917
I	C	M	two	23	14	7	3.125	23.227	0.88	3.238
I	C	M	two	23	12	7	3	95.98	18.264	16.354
I	C	M	two	23	15	10	3.1875	117.691	17.335	18.615
I	C	M	two	23	15	10	3.125	75.898	16.326	16.133
I	C	M	two	23	12	7	3.0625	63.257	3.779	9.086
I	C	M	two	23	12	5	2.875	58.282	11.521	11.557
I	C	M	two	23	12	5	3	72.976	14.693	13.765
I	C	M	two	23	13	7	3	45.66	5.784	8.774
I	C	M	two	23	13	8	3.125	60.781	8.971	12.666
I	C	M	two	23	16	6	3.1875	0	0	0
I	C	M	three	24	13	6	2.875	70.858	12.822	15.191
I	C	M	three	24	15	7	2.9375	3.814	0.064	0.442
I	C	M	three	24	15	7	2.9375	25.811	3.449	5.687
I	C	M	three	24	12	7	3.125	39.584	10.921	8.855
I	C	M	three	24	12	7	3.0625	82.258	13.28	14.9
I	C	M	three	24	12	7	2.9375	80.014	14.811	15.532
I	C	M	three	24	15	6	3	92.326	20.673	18.179
I	C	M	three	24	15	7	3.0625	1.463	0.05	0.247
I	C	M	three	24	15	6	2.9375	55.35	11.445	11.468
I	C	M	three	24	12	9	3.0625	61.782	10.843	13.028
I	C	M	three	24	12	8	3.0625	52.62	14.799	11.423
I	C	M	three	24	13	10	3.125	102.147	16.896	16.899
I	C	M	three	24	16	7	3	11.066	0.171	1.031
I	C	M	three	24	16	6	3	35.576	4.213	6.379
I	C	M	three	24	16	7	3.125	39.197	7.987	8.005
I	C	M	four	23	13	3	2.9375	82.716	15.649	16.582
I	C	M	four	23	13	5	2.875	88.361	14.578	14.106
I	C	M	four	23	15	8	3	78.323	18.475	17.4
I	C	M	four	23	12	7	3	45.365	4.405	7.59
I	C	M	four	23	12	5	2.9375	60.819	6.018	10.402
I	C	M	four	23	12	5	2.9375	60.819	6.018	10.402
I	C	M	four	23	12	6	3.125	78.605	13.651	12.846
I	C	M	four	23	15	7	3.25	80.707	14.832	15.261
I	C	M	four	23	15	5	3	71.486	15.909	14.33
I	C	M	four	23	15	6	3.1875	93.948	21.331	19.266
I	C	M	four	23	16	6	3.0625	99.196	17.836	17.822
I	C	M	four	23	16	4	3	68.426	16.101	15.368
I	C	M	four	23	16	6	2.875	98.285	24.753	19.75
I	C	M	four	23	13	5	2.9375	1.034	0.02	0.123
I	C	M	four	23	13	6	2.9375	26.181	2.146	5.175
I	C	M	five	23	12	4	3	50.905	9.975	9.945
I	C	M	five	23	14	10	3.1875	57.399	11.594	12.172
I	C	M	five	23	13	11	3.1875	58.463	1.697	5.508
I	C	M	five	23	14	8	3.25	58.236	15.614	13.879
I	C	M	five	23	16	8	3.125	43.013	3.873	8.45
I	C	M	five	23	17	5	3.0625	54.99	3.702	8.845
I	C	M	five	23	20	3	2.8125	113.877	9.329	18.088
I	C	M	five	23	14	8	3.25	61.81	14.793	13.654
I	C	M	five	23	14	6	3.125	68.295	20.582	14.786
I	C	M	five	23	14	5	3.125	119.655	16.35	17.809
I	C	M	five	23	14	6	3.125	78.822	14.98	16.688
I	C	M	five	23	15	5	3.125	44.872	5.941	9.397
I	C	M	five	23	15	7	3.1875	52.538	12.366	12.385
I	C	M	five	23	16	5	3	54.454	8.183	11.514
I	C	C	control	0	16	5	2.875	103.827	22.179	18.476
I	C	C	control	0	16	5	3	94.541	21.587	18.62
I	C	C	control	0	16	4	3.0625	97.319	28.351	19.708
I	C	C	control	0	14	9	3	63.135	12.152	11.248
I	C	C	control	0	16	7	3.1875	28.482	1.421	3.485
I	C	C	control	0	13	3	2.8125	67.11	7.036	11.811
I	C	C	control	0	12	9	3.0625	99.631	15.415	16.266
I	C	C	control	0	12	10	3.0625	65.316	15.64	14.458
I	C	C	control	0	14	10	3.1875	40.342	5.477	8.253
I	C	C	control	0	16	5	2.9375	83.366	14.21	15.06
I	C	C	control	0	16	5	2.9375	62.392	3.118	7.176
I	C	C	control	0	16	6	3.125	74.737	14.703	15.081
I	C	C	control	0	16	5	3.0625	53.563	3.04	7.166
I	C	C	control	0	15	10	3.25	72.541	15.48	14.175
I	C	C	control	0	16	5	3	31.363	1.795	4.297
I	C	C	control	0	16	5	3	95.916	10.101	14.288
I	C	C	control	0	16	5	3.125	92.967	5.806	13.04
I	C	C	control	0	12	8	3.0625	56.872	16.346	13.408
I	C	C	control	0	12	5	2.875	5.56	0.133	0.517
I	C	C	control	0	12	6	3.1875	70.087	5.072	9.048
I	C	C	control	0	12	9	3.125	66.639	13.668	11.942
I	C	C	control	0	13	5	2.9375	10.005	3.032	1.72
I	C	C	control	0	15	7	2.9375	77.533	18.623	16.54
I	C	C	control	0	15	5	3.1875	73.31	12.354	12.934
I	C	C	control	0	12	7	3.1875	66.398	4.769	12.011
I	C	C	control	0	13	9	3.1875	41.881	4.886	7.029
I	C	C	control	0	13	5	3.125	68.013	13.636	13.388
I	C	C	control	0	13	3	3	88.964	16.061	15.429
I	C	C	control	0	13	4	2.875	50.685	4.467	10.189
I	C	C	control	0	12	8	3.1875	80.821	12.551	13.064
I	C	C	control	0	12	8	3.125	63.362	15.425	13.133
I	C	C	control	0	16	8	3.0625	82.047	1.747	7.485
I	C	C	control	0	16	8	3.125	66.333	17.235	16.754

## Sheet: Line Means
Pop	Clone	Type	Line	GOD	AM	Egg	Sizemm	Maxv	Meanv	SDv
G	A	M	one	21	13.3571	5.85714	3.13393	7.64971	1.64236	1.30129
G	A	M	two	17	12.4	6.6	3.0125	6.7969	1.6819	1.3339
G	A	M	three	24	13.375	5.25	3.05469	7.09062	1.52863	1.21988
G	A	M	four	13	13.8333	5.41667	2.95833	7.12117	1.37483	1.21125
G	A	M	five	21	13.5714	5.92857	2.98661	8.34829	1.84043	1.49671
G	A	C	control	0	14.1944	6.22222	3.04514	49.7466	10.3026	9.19661
G	B	M	one	23	12.8182	4.54545	2.98295	9.20064	1.87891	1.52373
G	B	M	two	21	12.2143	5.57143	2.98214	38.7829	7.32107	6.80107
G	B	M	three	21	12.9231	5.15385	2.91346	8.97115	1.82154	1.46823
G	B	M	four	19	11.875	5.25	2.94531	86.1796	17.9594	16.0987
G	B	M	five	23	12.1111	5.11111	3	71.536	14.4924	12.6399
G	B	C	control	0	13.3846	4.92308	2.92949	25.3605	4.71395	4.24344
G	C	M	one	22	13.75	4.33333	2.95312	76.3141	18.2374	15.434
G	C	M	two	23	15.6	4.8	3.04375	74.2911	16.0637	14.2808
G	C	M	three	24	14.625	4.375	2.9375	71.625	14.5673	12.288
G	C	M	four	23	16	2.85714	2.91071	71.9447	16.0247	12.0543
G	C	M	five	22	17.1111	3.66667	2.89583	81.433	19.4528	16.4318
G	C	C	control	0	14.2353	4.26471	2.98529	73.365	16.7043	13.7352
I	A	M	one	26	13.9333	6.26667	2.87917	73.4977	14.0767	13.9179
I	A	M	two	25	15.0714	5.21429	2.96429	60.9149	10.3302	11.7827
I	A	M	three	25	14.25	7	3.01562	48.3656	8.94017	9.51725
I	A	M	four	24	15.9	5.1	3.0625	55.9891	9.4883	9.9845
I	A	M	five	24	13.3636	6.90909	3.00568	68.4797	11.9209	13.0191
I	A	C	control	0	14.8	6	2.84821	49.9445	7.82823	9.17789
I	B	M	one	23	14.4667	6.4	3.01667	78.1262	14.8799	13.7653
I	B	M	two	22	14.3846	6.76923	3.01442	77.7755	16.2879	14.7579
I	B	M	three	24	13.4667	7.13333	2.93333	70.0448	11.955	13.0483
I	B	M	four	23	13.3	8.8	2.90625	83.4931	15.8886	16.1874
I	B	M	five	23	14.6875	6.6875	3.01172	79.2127	15.9804	15.0747
I	B	C	control	0	13.96	6.6	2.895	69.5224	14.8737	14.2547
I	C	M	one	24	14.2667	6.86667	3.07083	62.2808	10.9343	11.9551
I	C	M	two	23	13.8	7.6	3.08333	56.0735	7.8906	9.71333
I	C	M	three	24	13.9333	7.13333	3.01667	50.2577	9.49493	9.81773
I	C	M	four	23	13.8667	5.6	3.00417	68.9514	12.7815	13.0949
I	C	M	five	23	14.8571	6.5	3.11161	65.5235	10.6414	12.3657
I	C	C	control	0	14.1515	6.45455	3.05682	66.5169	10.8338	11.7333
